# Supplementary material for: A Novel Hydrogel-Based 3D In Vitro Tumor Panel of 30 PDX Models Incorporates Tumor, Stromal and Immune Cell Compartments of the TME for the Screening of Oncology and Immuno-Therapies
Source: MDPI journal article supplement (doi:10.3390/cells12081145), 2023-04-13
Supplement: s1 [file s1]

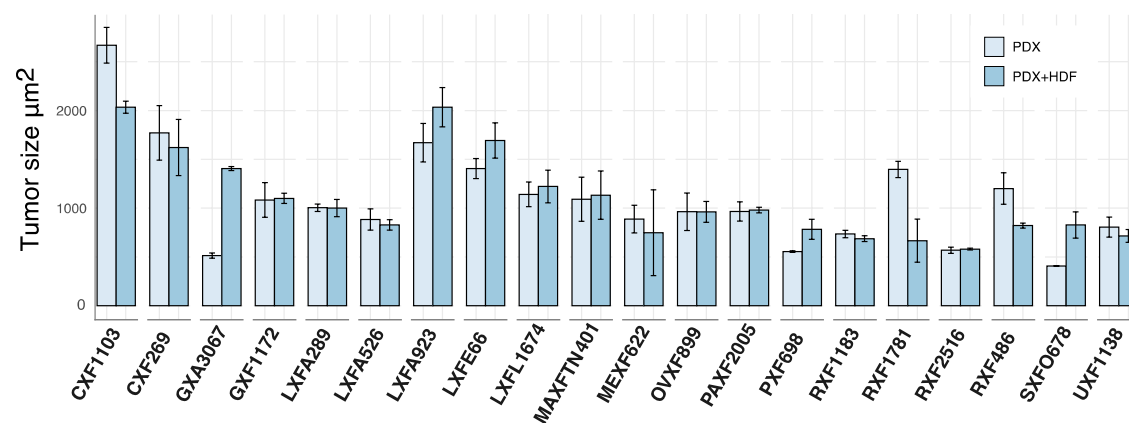

**Supplementary Figure S1:** Size differences of three-dimensional PDX tumorspheres in the hydrogel with or without fibroblasts (HDF).

**Supplementary Table S1: Cisplatin response in the 30 PDX Panel with respect to tumor size, total tumor area, and tumor cell death.**

**Tumor Size:**

| PDX      | IC50   | E0 $\mu\text{m}^2$ | E <sub>max</sub> $\mu\text{m}^2$ | E <sub>max</sub> /E0 % | Model         |
|----------|--------|--------------------|----------------------------------|------------------------|---------------|
| BXF1036  | 0.410  | 1,197.304          | 984.391                          | 82.217                 | Non-responder |
| CXF1103  | 6.702  | 2,893.946          | 847.768                          | 29.295                 | Size decrease |
| CXF269   | 3.272  | 1,932.417          | 1,033.153                        | 53.464                 | Size decrease |
| CXF94    | 18.871 | 2,614.970          | 1,137.931                        | 43.516                 | Size decrease |
| GXA3023  | 1.539  | 3,489.259          | 924.289                          | 26.490                 | Size decrease |
| GXA3067  | 19.726 | 1,632.501          | 959.381                          | 58.768                 | Size decrease |
| GXF251   | 0.155  | 1,991.304          | 874.050                          | 43.893                 | Size decrease |
| HNXF1853 | 12.549 | 548.885            | 395.661                          | 72.099                 | Size decrease |
| LIXAH575 | 3.346  | 1,031.103          | 585.118                          | 56.747                 | Size decrease |
| LXFA289  | 9.718  | 1,339.160          | 845.057                          | 63.104                 | Size decrease |
| LXFA526  | 1.807  | 1,640.877          | 768.664                          | 46.845                 | Size decrease |
| LXFA586  | 4.068  | 1,879.458          | 458.624                          | 24.402                 | Size decrease |
| LXFA629  | 1.930  | 2804.442           | 1670.827                         | 59.578                 | Size decrease |
| LXFA923  | 5.392  | 1,800.854          | 807.267                          | 44.827                 | Size decrease |
| LXFE66   | 1.112  | 1,640.863          | 934.159                          | 56.931                 | Size decrease |
| LXFL1674 | 0.542  | 1,463.166          | 880.382                          | 60.170                 | Size decrease |
| LXFL430  | 1.135  | 2020.332           | 431.899                          | 21.378                 | Size decrease |
| MAXF401  | 3.839  | 1,653.390          | 952.089                          | 57.584                 | Size decrease |
| MEXF1829 | 0.628  | 1,514.724          | 577.630                          | 38.134                 | Size decrease |
| MEXF622  | 0.131  | 1,642.478          | 640.231                          | 38.980                 | Size decrease |
| OVXF899  | 2.071  | 1,089.333          | 708.005                          | 64.994                 | Size decrease |
| PAXF1997 | 12.830 | 1,057.049          | 718.323                          | 67.956                 | Size decrease |
| PAXF2005 | 0.745  | 1,172.634          | 623.795                          | 53.196                 | Size decrease |
| PXF698   | 6.530  | 1,110.793          | 545.025                          | 49.066                 | Size decrease |
| RXF1781  | 12.657 | 1,493.652          | 517.138                          | 34.622                 | Size decrease |
| RXF2282  | 11.290 | 901.520            | 759.762                          | 84.276                 | Non-responder |
| RXF2516  | 1.975  | 1,510.002          | 653.449                          | 43.275                 | Size decrease |
| RXF486   | 14.036 | 1348.326           | 966.731                          | 71.699                 | Non-responder |
| SXFO678  | 12.930 | 799.479            | 1,102.661                        | 137.922                | Size increase |
| UXF1138  | 4.298  | 2,470.256          | 802.779                          | 32.498                 | Size decrease |

**Cut-off value**

Size decrease: E<sub>max</sub>/E0 % ≤ 80%

Non-responder: E<sub>max</sub>/E0 % > 80%

**Total Tumor Area:**

| PDX      | IC50   | E0 $\mu\text{m}^2$ | E <sub>max</sub> $\mu\text{m}^2$ | E <sub>max</sub> /E0 % | Model               |
|----------|--------|--------------------|----------------------------------|------------------------|---------------------|
| BXF1036  | 3.147  | 1,389,173.684      | 1,135,661.811                    | 81.751                 | Non-responder       |
| CXF1103  | 5.137  | 2,023,381.740      | 551,077.390                      | 27.235                 | Total area decrease |
| CXF269   | 2.055  | 1,151,246.537      | 455,655.324                      | 39.579                 | Total area decrease |
| CXF94    | 19.989 | 1,531,522.931      | 713,386.558                      | 46.580                 | Total area decrease |
| GXA3023  | 1.077  | 1,424,361.712      | 357,845.792                      | 25.123                 | Total area decrease |
| GXA3067  | 18.249 | 1,901,372.440      | 1,295,057.146                    | 68.112                 | Total area decrease |
| GXF251   | 0.280  | 1,299,385.648      | 543,685.155                      | 41.842                 | Total area decrease |
| HNXF1853 | 3.808  | 719,113.042        | 304,108.029                      | 42.289                 | Total area decrease |
| LIXAH575 | 2.310  | 1,217,517.701      | 773,179.791                      | 63.505                 | Total area decrease |
| LXFA289  | 40.067 | 1,117,475.276      | 606,288.142                      | 54.255                 | Total area decrease |
| LXFA526  | 2.233  | 1,085,465.113      | 476,134.625                      | 43.865                 | Total area decrease |
| LXFA586  | 4.852  | 1,639,872.286      | 254,047.076                      | 15.492                 | Total area decrease |
| LXFA629  | 3.034  | 1,042,007.864      | 508,655.491                      | 48.815                 | Total area decrease |
| LXFA923  | 14.922 | 1,293,031.686      | 513,748.508                      | 39.732                 | Total area decrease |
| LXFE66   | 1.774  | 1,422,400.821      | 823,195.947                      | 57.874                 | Total area decrease |
| LXFL1674 | 2.177  | 1,431,322.643      | 861,936.070                      | 60.220                 | Total area decrease |
| LXFL430  | 0.965  | 1,128,632.246      | 260,115.587                      | 23.047                 | Total area decrease |
| MAXF401  | 5.265  | 1,822,982.132      | 1,072,091.503                    | 58.810                 | Total area decrease |
| MEXF1829 | 0.741  | 1,278,186.541      | 453,558.531                      | 35.485                 | Total area decrease |
| MEXF622  | 0.188  | 1,208,668.882      | 460,941.281                      | 38.136                 | Total area decrease |
| OVXF899  | 1.954  | 1,357,645.255      | 909,396.612                      | 66.983                 | Total area decrease |
| PAXF1997 | 4.025  | 1,179,388.292      | 678,701.389                      | 57.547                 | Total area decrease |
| PAXF2005 | 0.463  | 686,066.241        | 270,225.903                      | 39.388                 | Total area decrease |
| PXF698   | 11.591 | 687,747.327        | 404,327.741                      | 58.790                 | Total area decrease |
| RXF1781  | 15.222 | 1,240,237.511      | 436,083.384                      | 35.161                 | Total area decrease |
| RXF2282  | 25.552 | 1,178,304.752      | 1,007,499.161                    | 85.504                 | Non-responder       |
| RXF2516  | 7.278  | 1,110,121.734      | 453,792.124                      | 40.878                 | Total area decrease |
| RXF486   | 4.206  | 623,394.394        | 276,094.022                      | 44.289                 | Total area decrease |
| SXFO678  | 0.831  | 904,502.296        | 1,350,703.010                    | 149.331                | Total area increase |
| UXF1138  | 0.832  | 1,301,241.870      | 436,428.211                      | 33.539                 | Total area decrease |

**Cut-off value**Total area decrease: E<sub>max</sub>/E<sub>0</sub> % ≤ 80%Non-responder: E<sub>max</sub>/E<sub>0</sub> % > 80%

**Tumor Death:**

| PDX      | EC50    | E0 %   | E <sub>max</sub> % | E <sub>max</sub> /E0 % | Model          |
|----------|---------|--------|--------------------|------------------------|----------------|
| BXF1036  | 4.606   | 8.596  | 37.198             | 432.760                | Death increase |
| CXF1103  | 35.510  | 7.215  | 56.282             | 780.051                | Death increase |
| CXF269   | N/A     | 1.367  | 2.832              | 207.097                | N/A            |
| CXF94    | 165.120 | 7.448  | 28.454             | 382.034                | Death increase |
| GXA3023  | 31.550  | 10.969 | 43.842             | 399.684                | Death increase |
| GXA3067  | 36.776  | 2.973  | 31.683             | 1,065.787              | Death increase |
| GXF251   | 6.588   | 4.415  | 22.342             | 506.007                | Death increase |
| HNXF1853 | 13.308  | 4.710  | 12.967             | 275.310                | Death increase |
| LIXAH575 | 4.565   | 12.653 | 32.118             | 253.841                | Death increase |
| LXFA289  | 167.137 | 12.166 | 34.487             | 283.471                | Death increase |
| LXFA526  | 3.726   | 10.970 | 18.171             | 165.642                | Death increase |
| LXFA586  | 3.982   | 9.837  | 54.845             | 557.551                | Death increase |
| LXFA629  | 49.859  | 12.896 | 39.271             | 304.513                | Death increase |
| LXFA923  | 91.761  | 0.884  | 16.232             | 1,836.260              | Death increase |
| LXFE66   | 9.015   | 5.801  | 47.390             | 816.966                | Death increase |
| LXFL1674 | 12.258  | 13.007 | 25.241             | 194.055                | Death increase |
| LXFL430  | 7.890   | 6.466  | 59.187             | 915.398                | Death increase |
| MAXF401  | 39.812  | 11.830 | 46.283             | 391.230                | Death increase |
| MEXF1829 | 16.027  | 14.435 | 49.451             | 342.574                | Death increase |
| MEXF622  | 3.056   | 5.198  | 56.110             | 1,079.498              | Death increase |
| OVXF899  | 3.194   | 13.133 | 29.501             | 224.630                | Death increase |
| PAXF1997 | 58.423  | 1.227  | 7.386              | 602.204                | Death increase |
| PAXF2005 | 7.982   | 6.104  | 41.309             | 676.784                | Death increase |
| PXF698   | 32.655  | 3.123  | 21.643             | 692.936                | Death increase |
| RXF1781  | 28.964  | 6.543  | 52.770             | 806.552                | Death increase |
| RXF2282  | 0.819   | 28.293 | 24.909             | 88.038                 | Death decrease |
| RXF2516  | 39.426  | 3.046  | 38.636             | 1,268.221              | Death increase |
| RXF486   | 33.690  | 9.260  | 65.183             | 703.888                | Death increase |
| SXFO678  | 13.038  | 23.720 | 35.002             | 147.567                | Death increase |
| UXF1138  | 29.566  | 3.430  | 42.691             | 1,244.711              | Death increase |

**Cut-off value**Death decrease:  $E_{\max} > E_0$ Death increase:  $E_{\max} < E_0$

**Supplementary Table S2: Solitomab  $E_{\max}/E_0$  % in the 30 PDX Panel for total tumor area and death**

| PDX      | Tumor Area | Tumor Death |
|----------|------------|-------------|
| CXF1103  | 55.47      | 167.577     |
| CXF269   | 57.536     | 211.625     |
| CXF94    | 64.349     | 258.689     |
| GXA3023  | 70.387     | 146.802     |
| GXA3067  | 97.648     | 526.834     |
| GXF251   | 62.026     | 282.019     |
| HNXF1853 | 68.037     | 108.797     |
| LIXAH575 | 81.715     | 197.973     |
| LXFA289  | 86.913     | 155.412     |
| LXFA526  | 68.601     | 70.791      |
| LXFA586  | 68.575     | 184.121     |
| LXFA629  | 107.446    | 64.752      |
| LXFA923  | 83.035     | 63.279      |
| LXFE66   | 89.734     | 704.046     |
| LXFL1674 | 78.708     | 120.973     |
| LXFL430  | 57.981     | 152.877     |
| MAXF401  | 77.553     | 193.14      |
| MEXF1829 | 91.838     | 117.033     |
| MEXF622  | 69.16      | 95.368      |
| OVXF899  | 90.761     | 203.143     |
| PAXF1997 | 63.019     | 268.438     |
| PAXF2005 | 76.796     | 158.448     |
| PXF698   | 96.807     | 146.05      |
| RXF1781  | 101.658    | 116.331     |
| RXF2282  | 99.742     | 131.239     |
| RXF2516  | 79.691     | 176.251     |
| RXF486   | 110.947    | 162.793     |
| SXFO678  | 78.699     | 48210.8     |
| SXFS1301 | 117.859    | 75.287      |
| UXF1138  | 57.175     | 1173.58     |

**Supplementary Table S3: ICI Atezolizumab and Nivolumab heat maps of total tumor area and tumor cell death compared to the positive control, Solitomab, in a subset up PDX models.**

**$E_{\max}/E_0$  % for Total Tumor Area**

| PDX       | Solitomab | Atezolizumab | Nivolumab |
|-----------|-----------|--------------|-----------|
| OVXF 899  | 66        | 86           | 86        |
| GXA 3067  | 77        | 96           | 95        |
| LXFA 526  | 85        | 89           | 88        |
| CXF 269   | 60        | 91           | 90        |
| PAXF 1997 | 67        | 79           | 88        |

Solitomab served as the positive control.

**$E_{\max}/E_0$  % for Tumor Death**

| PDX       | Solitomab | Atezolizumab | Nivolumab |
|-----------|-----------|--------------|-----------|
| OVXF 899  | 587       | 147          | 98        |
| GXA 3067  | 1262      | 118          | 136       |
| LXFA 526  | 174       | 115          | 121       |
| CXF 269   | 1318      | 98           | 90        |
| PAXF 1997 | 617       | 67           | 65        |

Solitomab served as the positive control.

**Supplementary Table S4: ICI Ipilimumab heat maps of total tumor area and tumor cell death compared to the positive control, Solitomab, in a subset up PDX models.**

**$E_{\max}/E_0$  % for Total Tumor Area**

| PDX       | Solitomab | Ipilimumab |
|-----------|-----------|------------|
| OVXF 899  | 66        | 52         |
| GXA 3067  | 64        | 61         |
| LXFA 526  | 83        | 79         |
| CXF 269   | 52        | 50         |
| PAXF 1997 | 71        | 83         |

Solitomab served as the positive control.

**$E_{\max}/E_0$  % for Tumor Death**

| PDX       | Solitomab | Ipilimumab |
|-----------|-----------|------------|
| OVXF 899  | 669       | 794        |
| GXA 3067  | 1195      | 1009       |
| LXFA 526  | 126       | 122        |
| CXF 269   | 1796      | 341        |
| PAXF 1997 | 1053      | 265        |

Solitomab served as the positive control.

**Supplementary Table S5: PBMCs embedded vs surface  $E_{max}/E_0$  % for Total Tumor Area for one PDX model, LXFA 526, with ICI Nivolumab treatment**

| PDX      | Total Tumor Area |
|----------|------------------|
| Embedded | 61               |
| Surface  | 87               |

The same PBMC was used for both the embedding and surface test.
